# Supplementary material for: Profiling microplastic fibers in the intertidal sentinel mussel Brachidontes rodriguezii from the coast of Buenos Aires, Argentina
Source: PeerJ. 2025 Jun 11;13:e19518. doi: 10.7717/peerj.19518 (PMC12166848; doi:10.7717/peerj.19518)
Supplement: Supplemental Information 1 — Raw data of shell length (mm), total weight (g) and soft tissue wet weight (g) per sampling site (n = 10 individuals per site). [file peerj-13-19518-s001.xlsx]

## Sheet: Sheet1
Sampling site	Individual	Shell lenght (mm)	Total weight (g)	Soft tissue weight (g)	Condition index
S1	1	22.78	0.98	0.26	26.5306
S1	2	22.83	0.92	0.33	35.8696
S1	3	18.17	0.57	0.21	36.8421
S1	4	22.06	0.85	0.26	30.5882
S1	5	20.98	0.79	0.25	31.6456
S1	6	20.49	0.75	0.27	36
S1	7	24.94	1.18	0.42	35.5932
S1	8	19.65	0.8	0.32	40
S1	9	20.58	0.65	0.26	40
S1	10	21.67	1	0.32	32
S2	1	19.81	0.67	0.21	31.3433
S2	2	22.24	0.9	0.26	28.8889
S2	3	27.41	1.37	0.37	27.0073
S2	4	23.7	0.96	0.27	28.125
S2	5	24.96	1.06	0.31	29.2453
S2	6	21.15	0.82	0.21	25.6098
S2	7	26.14	1.46	0.37	25.3425
S2	8	22.59	0.98	0.32	32.6531
S2	9	19.89	0.7	0.19	27.1429
S2	10	23.43	1	0.32	32
S3	1	21.08	0.99	0.31	31.3131
S3	2	22.55	0.84	0.3	35.7143
S3	3	22.8	0.89	0.3	33.7079
S3	4	21.93	0.64	0.2	31.25
S3	5	21.45	0.74	0.24	32.4324
S3	6	21.57	0.9	0.29	32.2222
S3	7	19.93	0.71	0.23	32.3944
S3	8	22.71	0.67	0.2	29.8507
S3	9	21	0.82	0.24	29.2683
S3	10	24.39	1.54	0.41	26.6234
S4	1	16.55	0.37	0.05	13.5135
S4	2	15.53	0.22	0.07	31.8182
S4	3	17	0.35	0.1	28.5714
S4	4	18.61	0.5	0.1	20
S4	5	19.55	0.61	0.16	26.2295
S4	6	18.02	0.43	0.1	23.2558
S4	7	16.86	0.4	0.11	27.5
S4	8	17.74	0.44	0.09	20.4545
S4	9	16.99	0.33	0.1	30.303
S4	10	16.75	0.41	0.09	21.9512
