# Supplementary material for: Profiling microplastic fibers in the intertidal sentinel mussel Brachidontes rodriguezii from the coast of Buenos Aires, Argentina
Source: PeerJ. 2025 Jun 11;13:e19518. doi: 10.7717/peerj.19518 (PMC12166848; doi:10.7717/peerj.19518)
Supplement: Supplemental Information 2 — Raw data of the microplastics color abundance per individual in each sampling site (n = 10 individuals per site). [file peerj-13-19518-s002.xlsx]

## Sheet: Hoja1
Sampling site	Individual	MPs Color	MPs Abundance/individual
S1	1	Translucent	1
S1	1	Yellow	0
S1	1	Red	0
S1	1	Blue	0
S1	1	Black	0
S1	2	Translucent	0
S1	2	Yellow	1
S1	2	Red	0
S1	2	Blue	0
S1	2	Black	0
S1	3	Translucent	2
S1	3	Yellow	0
S1	3	Red	1
S1	3	Blue	2
S1	3	Black	0
S1	4	Translucent	0
S1	4	Yellow	0
S1	4	Red	2
S1	4	Blue	2
S1	4	Black	0
S1	5	Translucent	1
S1	5	Yellow	0
S1	5	Red	0
S1	5	Blue	0
S1	5	Black	1
S1	6	Translucent	2
S1	6	Yellow	0
S1	6	Red	1
S1	6	Blue	2
S1	6	Black	1
S1	7	Translucent	0
S1	7	Yellow	0
S1	7	Red	0
S1	7	Blue	2
S1	7	Black	1
S1	8	Translucent	1
S1	8	Yellow	0
S1	8	Red	0
S1	8	Blue	1
S1	8	Black	0
S1	9	Translucent	5
S1	9	Yellow	0
S1	9	Red	2
S1	9	Blue	1
S1	9	Black	0
S1	10	Translucent	2
S1	10	Yellow	0
S1	10	Red	2
S1	10	Blue	3
S1	10	Black	2
S2	1	Translucent	5
S2	1	Yellow	0
S2	1	Red	0
S2	1	Blue	1
S2	1	Black	0
S2	2	Translucent	2
S2	2	Yellow	0
S2	2	Red	0
S2	2	Blue	0
S2	2	Black	0
S2	3	Translucent	7
S2	3	Yellow	0
S2	3	Red	0
S2	3	Blue	3
S2	3	Black	1
S2	4	Translucent	2
S2	4	Yellow	0
S2	4	Red	0
S2	4	Blue	1
S2	4	Black	0
S2	5	Translucent	8
S2	5	Yellow	2
S2	5	Red	1
S2	5	Blue	3
S2	5	Black	1
S2	6	Translucent	5
S2	6	Yellow	0
S2	6	Red	0
S2	6	Blue	3
S2	6	Black	0
S2	7	Translucent	8
S2	7	Yellow	0
S2	7	Red	1
S2	7	Blue	2
S2	7	Black	2
S2	8	Translucent	4
S2	8	Yellow	0
S2	8	Red	0
S2	8	Blue	1
S2	8	Black	2
S2	9	Translucent	5
S2	9	Yellow	0
S2	9	Red	3
S2	9	Blue	1
S2	9	Black	1
S2	10	Translucent	4
S2	10	Yellow	0
S2	10	Red	3
S2	10	Blue	2
S2	10	Black	0
S3	1	Translucent	1
S3	1	Yellow	0
S3	1	Red	0
S3	1	Blue	1
S3	1	Black	0
S3	2	Translucent	3
S3	2	Yellow	0
S3	2	Red	0
S3	2	Blue	0
S3	2	Black	0
S3	3	Translucent	1
S3	3	Yellow	0
S3	3	Red	0
S3	3	Blue	3
S3	3	Black	0
S3	4	Translucent	3
S3	4	Yellow	0
S3	4	Red	0
S3	4	Blue	0
S3	4	Black	0
S3	5	Translucent	4
S3	5	Yellow	0
S3	5	Red	0
S3	5	Blue	1
S3	5	Black	0
S3	6	Translucent	5
S3	6	Yellow	0
S3	6	Red	2
S3	6	Blue	0
S3	6	Black	0
S3	7	Translucent	2
S3	7	Yellow	0
S3	7	Red	0
S3	7	Blue	0
S3	7	Black	0
S3	8	Translucent	0
S3	8	Yellow	0
S3	8	Red	0
S3	8	Blue	0
S3	8	Black	0
S3	9	Translucent	1
S3	9	Yellow	0
S3	9	Red	1
S3	9	Blue	0
S3	9	Black	0
S3	10	Translucent	2
S3	10	Yellow	0
S3	10	Red	0
S3	10	Blue	0
S3	10	Black	1
S4	1	Translucent	9
S4	1	Yellow	0
S4	1	Red	1
S4	1	Blue	2
S4	1	Black	1
S4	2	Translucent	8
S4	2	Yellow	0
S4	2	Red	2
S4	2	Blue	1
S4	2	Black	0
S4	3	Translucent	6
S4	3	Yellow	0
S4	3	Red	0
S4	3	Blue	0
S4	3	Black	0
S4	4	Translucent	4
S4	4	Yellow	0
S4	4	Red	0
S4	4	Blue	0
S4	4	Black	1
S4	5	Translucent	5
S4	5	Yellow	0
S4	5	Red	1
S4	5	Blue	2
S4	5	Black	1
S4	6	Translucent	5
S4	6	Yellow	0
S4	6	Red	0
S4	6	Blue	1
S4	6	Black	1
S4	7	Translucent	6
S4	7	Yellow	0
S4	7	Red	0
S4	7	Blue	1
S4	7	Black	0
S4	8	Translucent	9
S4	8	Yellow	0
S4	8	Red	1
S4	8	Blue	1
S4	8	Black	2
S4	9	Translucent	6
S4	9	Yellow	0
S4	9	Red	0
S4	9	Blue	1
S4	9	Black	0
S4	10	Translucent	4
S4	10	Yellow	0
S4	10	Red	1
S4	10	Blue	0
S4	10	Black	0
