# Supplementary material for: Profiling microplastic fibers in the intertidal sentinel mussel Brachidontes rodriguezii from the coast of Buenos Aires, Argentina
Source: PeerJ. 2025 Jun 11;13:e19518. doi: 10.7717/peerj.19518 (PMC12166848; doi:10.7717/peerj.19518)
Supplement: Supplemental Information 3 — Raw data of the microplastics abundance per individual and per soft tissue wet weight in each sampling site (n = 10 individuals per site). [file peerj-13-19518-s003.xlsx]

## Sheet: Sheet1
Sampling site	Individual	MPs abundance (items/individual)	MPs abundance (items/g ww)
S1	1	1	3.84615
S1	2	1	3.0303
S1	3	5	23.8095
S1	4	4	15.3846
S1	5	2	8
S1	6	6	22.2222
S1	7	3	7.14286
S1	8	2	6.25
S1	9	8	30.7692
S1	10	9	28.125
S2	1	6	28.5714
S2	2	2	7.69231
S2	3	11	29.7297
S2	4	3	11.1111
S2	5	15	48.3871
S2	6	8	38.0952
S2	7	13	35.1351
S2	8	7	21.875
S2	9	10	52.6316
S2	10	9	28.125
S3	1	2	6.45161
S3	2	3	10
S3	3	4	13.3333
S3	4	3	15
S3	5	5	20.8333
S3	6	7	24.1379
S3	7	2	8.69565
S3	8	3	15
S3	9	2	8.33333
S3	10	3	7.31707
S4	1	13	260
S4	2	11	157.143
S4	3	6	60
S4	4	5	50
S4	5	9	56.25
S4	6	7	70
S4	7	7	63.6364
S4	8	13	144.444
S4	9	7	70
S4	10	5	55.5556
